# Supplementary material
Source: HighWire-hosted journal article supplement (https://tsaco.smart01.highwire.org/content/9/1/e001230)
Supplement: inline-supplementary-material-1 [file inline-supplementary-material-1.pdf]

## Supplemental tables

**Table S1** – Sensitivity analysis A: patients weighing < 50 kg that received enoxaparin 30 mg BID (n=64) or 40 mg BID (n=4) are included in the WB cohort.

|                                      | VTE                      | DVT                      | PE                       |
|--------------------------------------|--------------------------|--------------------------|--------------------------|
| <b>Model diagnostics</b>             |                          |                          |                          |
| Observations (n)                     | 4272                     | 4272                     | 4230                     |
| AUC                                  | 0.809                    | 0.807                    | 0.848                    |
| Hosmer-Lemeshow GOF                  | 0.256                    | 0.656                    | 0.357                    |
| <b>Variables: aOR (95% CI)</b>       |                          |                          |                          |
| Weight-based dosing                  | 0.82 (0.42, 1.59)        | 0.93 (0.41, 2.13)        | 0.76 (0.38, 1.51)        |
| Age                                  | <b>1.03 (1.01, 1.05)</b> | <b>1.03 (1.01, 1.06)</b> | --                       |
| Obesity                              | 1.58 (0.99, 2.49)        | 1.56 (0.92, 2.67)        | 1.84 (0.81, 4.18)        |
| ISS                                  | <b>1.02 (1.01, 1.04)</b> | 1.02 (0.99, 1.03)        | <b>1.03 (1.00, 1.05)</b> |
| Other race                           | 0.69 (0.41, 1.15)        | 0.68 (0.39, 1.16)        | --                       |
| Medicare/Medicaid                    | --                       | --                       | 0.54 (0.27, 1.06)        |
| Self-pay, uninsured                  | --                       | --                       | 1.65 (0.94, 2.90)        |
| Early prophylaxis ( $\leq$ 24 hours) | <b>0.46 (0.29, 0.74)</b> | <b>0.41 (0.24, 0.68)</b> | --                       |
| RBC transfusions                     | <b>1.06 (1.02, 1.11)</b> | <b>1.06 (1.03, 1.10)</b> | <b>1.06 (1.01, 1.12)</b> |
| Penetrating mechanism                | 1.48 (0.94, 2.35)        | 1.39 (0.88, 2.19)        | 1.82 (0.88, 3.75)        |
| TXA                                  | --                       | 1.65 (0.99, 2.76)        | --                       |
| <b>VTE risk factors</b>              |                          |                          |                          |
| Head AIS $\geq$ 3                    | --                       | 1.36 (0.91, 2.02)        | 0.50 (0.24, 1.07)        |
| Chest AIS $\geq$ 3                   | 1.50 (0.96, 2.34)        | <b>1.64 (1.07, 2.51)</b> | --                       |
| Shock on admission                   | --                       | 0.66 (0.43, 1.01)        | --                       |

|                                                   |                          |                          |                          |
|---------------------------------------------------|--------------------------|--------------------------|--------------------------|
| Lower extremity long bone fracture                | 1.34 (0.94, 1.92)        | --                       | 1.69 (0.88, 3.23)        |
| Spinal cord injury                                | 1.72 (0.96, 3.07)        | --                       | <b>2.21 (1.11, 4.41)</b> |
| Central venous catheter                           | <b>2.61 (1.38, 4.95)</b> | <b>2.43 (1.05, 5.60)</b> | <b>2.99 (1.29, 6.92)</b> |
| Femoral catheter                                  | <b>2.08 (1.08, 4.00)</b> | 2.02 (0.98, 4.18)        | 1.56 (0.89, 2.74)        |
| Prolonged mechanical ventilation ( $\geq 4$ days) | --                       | --                       | 2.12 (0.97, 4.64)        |

**Table S2** – Sensitivity analysis B: patients weighing  $\geq 70$  kg (n=277) that received enoxaparin 40 mg BID are included in the WB cohort.

|                                      | VTE                      | DVT                      | PE                        |
|--------------------------------------|--------------------------|--------------------------|---------------------------|
| <b>Model diagnostics</b>             |                          |                          |                           |
| Observations (n)                     | 4538                     | 4538                     | 4495                      |
| AUC                                  | 0.808                    | 0.800                    | 0.856                     |
| Hosmer-Lemeshow GOF                  | 0.104                    | 0.280                    | 0.260                     |
| <b>Variables: aOR (95% CI)</b>       |                          |                          |                           |
| Weight-based dosing                  | 0.68 (0.38, 1.20)        | 0.72 (0.36, 1.46)        | 0.69 (0.44, 1.09)         |
| Age                                  | <b>1.03 (1.01, 1.05)</b> | 1.03 (0.99, 1.06)        | --                        |
| Obesity                              | <b>1.48 (1.05, 2.07)</b> | 1.39 (0.96, 2.00)        | 1.75 (0.85, 3.59)         |
| ISS                                  | <b>1.03 (1.01, 1.04)</b> | <b>1.02 (1.00, 1.04)</b> | <b>1.03 (1.01, 1.05)</b>  |
| Medicare/Medicaid                    | --                       | --                       | 0.55 (0.28, 1.09)         |
| Self-pay, uninsured                  |                          |                          | <b>1.67 (1.04, 2.70)</b>  |
| Race, other                          | --                       | <b>0.71 (0.46, 1.11)</b> | --                        |
| Early prophylaxis ( $\leq 24$ hours) | <b>0.53 (0.35, 0.81)</b> | <b>0.45 (0.30, 0.67)</b> | --                        |
| RBC transfusions                     | <b>1.06 (1.02, 1.09)</b> | <b>1.05 (1.02, 1.08)</b> | <b>1.07 (1.03, 1.12)</b>  |
| Penetrating mechanism                | 1.44 (0.98, 2.12)        | --                       | <b>1.85 (1.01, 3.40)</b>  |
| TXA                                  | --                       | 1.51 (0.92, 2.47)        | --                        |
| <b>VTE risk factors</b>              |                          |                          |                           |
| Chest AIS $\geq 3$                   | 1.38 (0.93, 2.07)        | 1.38 (0.93, 2.06)        | --                        |
| Lower extremity long bone fracture   | 1.32 (0.97, 1.80)        | --                       | 1.56 (0.91, 2.70)         |
| Spinal cord injury                   | <b>1.73 (1.01, 2.98)</b> | --                       | <b>2.60 (1.31, 5.15)</b>  |
| Central venous catheter              | <b>2.94 (1.61, 5.38)</b> | <b>2.61 (1.27, 5.36)</b> | <b>5.05 (2.55, 10.00)</b> |
| Femoral catheter                     | <b>1.65 (0.83, 3.31)</b> | 1.81 (0.83, 3.93)        | --                        |

**Table S3** – Sensitivity analysis C: subgroup analysis of obese patients (BMI  $\geq$  30) that received either SFD (n = 1002) or WB (n = 36) enoxaparin dosing for VTE prophylaxis. Analysis for PE risk was not completed due to the very low number of events.

|                                     | VTE                      | DVT                       |
|-------------------------------------|--------------------------|---------------------------|
| <b>Model diagnostics</b>            |                          |                           |
| Observations (n)                    | 1227                     | 1227                      |
| AUC                                 | 0.816                    | 0.797                     |
| Hosmer-Lemeshow GOF                 | 0.913                    | 0.745                     |
| <b>Variables: aOR (95% CI)</b>      |                          |                           |
| Weight-based dosing                 | 0.70 (0.27, 1.78)        | 0.84 (0.25, 2.76)         |
| Age                                 | --                       | --                        |
| ISS                                 | <b>1.04 (1.02, 1.06)</b> | <b>1.03 (0.99, 1.07)</b>  |
| Personal history of VTE             |                          | <b>3.76 (1.08, 13.02)</b> |
| Early prophylaxis ( $\leq$ 48 days) | 0.64 (0.39, 1.06)        | --                        |
| Penetrating mechanism               | <b>2.10 (1.22, 3.61)</b> | --                        |
| TXA                                 | 2.07 (0.97, 4.42)        | <b>3.23 (1.66, 6.29)</b>  |
| <b>VTE risk factors</b>             |                          |                           |
| Shock                               | <b>2.82 (1.54, 5.17)</b> | --                        |
| Chest AIS $\geq$ 3                  | --                       | <b>1.92 (1.25, 2.96)</b>  |
| Abdomen AIS $\geq$ 3                | --                       | 1.68 (0.79, 3.57)         |
| Lower extremity long bone fracture  | 1.85 (0.97, 3.50)        | --                        |
| Spinal cord injury                  | <b>2.24 (1.16, 4.31)</b> | --                        |
| Central venous catheter             | <b>2.87 (1.31, 6.30)</b> | 2.33 (0.93, 5.84)         |

**Table S4** – Power calculations to determine the number of observations needed in WB and SFD arms to detect a statistically significant difference of treatment effect for a VTE incidence of 4-30% among the SFD cohort. Alpha = 0.05. Beta = 0.80. Assuming 1:3 ratio of WB to SFD patients. Shaded squares indicate conditions under which this analysis would be adequately powered.

|                                    | % reduction in VTE incidence among WB cohort |                       |                      |
|------------------------------------|----------------------------------------------|-----------------------|----------------------|
|                                    | 15%                                          | 30%                   | 50%                  |
| <b>VTE incidence in SFD cohort</b> |                                              |                       |                      |
| 4%                                 | WB: 10,489<br>SFD: 31,789                    | WB: 2458<br>SFD: 7447 | WB: 803<br>SFD: 2434 |
| 7%                                 | WB: 5818<br>SFD: 17,630                      | WB: 1366<br>SFD: 4138 | WB: 447<br>SFD: 1355 |
| 12%                                | WB: 3222<br>SFD: 9765                        | WB: 759<br>SFD: 2299  | WB: 249<br>SFD: 756  |
| 20%                                | WB: 1769<br>SFD: 5361                        | WB: 419<br>SFD: 1270  | WB: 139<br>SFD: 420  |
| 30%                                | WB: 1042<br>SFD: 3159                        | WB: 755<br>SFD: 249   | WB: 80<br>SFD: 252   |

Table S5 – STROBE checklist for cohort study

|                          | Item No | Completed?                          | Recommendation                                                                                                                                                                       | Page number       |
|--------------------------|---------|-------------------------------------|--------------------------------------------------------------------------------------------------------------------------------------------------------------------------------------|-------------------|
| Title and abstract       | 1       | <input checked="" type="checkbox"/> | (a) Indicate the study's design with a commonly used term in the title or the abstract                                                                                               | Title page        |
|                          |         | <input checked="" type="checkbox"/> | (b) Provide in the abstract an informative and balanced summary of what was done and what was found                                                                                  | Abstract          |
| <b>Introduction</b>      |         |                                     |                                                                                                                                                                                      |                   |
| Background/rationale     | 2       | <input checked="" type="checkbox"/> | Explain the scientific background and rationale for the investigation being reported                                                                                                 | 1                 |
| Objectives               | 3       | <input checked="" type="checkbox"/> | State specific objectives, including any prespecified hypotheses                                                                                                                     | 2                 |
| <b>Methods</b>           |         |                                     |                                                                                                                                                                                      |                   |
| Study design             | 4       | <input checked="" type="checkbox"/> | Present key elements of study design early in the paper                                                                                                                              | 2-7               |
| Setting                  | 5       | <input checked="" type="checkbox"/> | Describe the setting, locations, and relevant dates, including periods of recruitment, exposure, follow-up, and data collection                                                      | 2-3               |
| Participants             | 6       | <input checked="" type="checkbox"/> | (a) Give the eligibility criteria, and the sources and methods of selection of participants. Describe methods of follow-up                                                           | 2-4               |
|                          |         | n/a                                 | (b) For matched studies, give matching criteria and number of exposed and unexposed                                                                                                  | n/a               |
| Variables                | 7       | <input checked="" type="checkbox"/> | Clearly define all outcomes, exposures, predictors, potential confounders, and effect modifiers. Give diagnostic criteria, if applicable                                             | 3-4               |
| Data sources/measurement | 8*      | <input checked="" type="checkbox"/> | For each variable of interest, give sources of data and details of methods of assessment (measurement). Describe comparability of assessment methods if there is more than one group | 2-3               |
| Bias                     | 9       | <input checked="" type="checkbox"/> | Describe any efforts to address potential sources of bias                                                                                                                            | 4-6               |
| Study size               | 10      | <input checked="" type="checkbox"/> | Explain how the study size was arrived at                                                                                                                                            | 4-5<br>Figure 1   |
| Quantitative variables   | 11      | <input checked="" type="checkbox"/> | Explain how quantitative variables were handled in the analyses. If applicable, describe which groupings were chosen and why                                                         | 4-7               |
| Statistical methods      | 12      | <input checked="" type="checkbox"/> | (a) Describe all statistical methods, including those used to control for confounding                                                                                                | 4-7               |
|                          |         | <input checked="" type="checkbox"/> | (b) Describe any methods used to examine subgroups and interactions                                                                                                                  | 4-7<br>Supplement |
|                          |         | <input checked="" type="checkbox"/> | (c) Explain how missing data were addressed                                                                                                                                          | 4<br>Figure 1     |
|                          |         | n/a                                 | (d) If applicable, explain how loss to follow-up was addressed                                                                                                                       | n/a               |
|                          |         | <input checked="" type="checkbox"/> | (e) Describe any sensitivity analyses                                                                                                                                                | 5-6<br>Supplement |
| <b>Results</b>           |         |                                     |                                                                                                                                                                                      |                   |
| Participants             | 13*     | <input checked="" type="checkbox"/> | (a) Report numbers of individuals at each stage of study—eg numbers potentially eligible, examined                                                                                   | 4-8<br>Figure 1   |

|                          |     |                                     |                                                                                                                                                                                                              |                               |
|--------------------------|-----|-------------------------------------|--------------------------------------------------------------------------------------------------------------------------------------------------------------------------------------------------------------|-------------------------------|
|                          |     |                                     | for eligibility, confirmed eligible, included in the study, completing follow-up, and analysed                                                                                                               |                               |
|                          |     | <input checked="" type="checkbox"/> | (b) Give reasons for non-participation at each stage                                                                                                                                                         | 4-8<br>Figure 1               |
|                          |     | <input checked="" type="checkbox"/> | (c) Consider use of a flow diagram                                                                                                                                                                           | Figure 1                      |
| Descriptive data         | 14* | <input checked="" type="checkbox"/> | (a) Give characteristics of study participants (eg demographic, clinical, social) and information on exposures and potential confounders                                                                     | Table 1, 2                    |
|                          |     | <input checked="" type="checkbox"/> | (b) Indicate number of participants with missing data for each variable of interest                                                                                                                          | Table 1                       |
|                          |     | n/a                                 | (c) Summarise follow-up time (eg, average and total amount)                                                                                                                                                  | n/a                           |
| Outcome data             | 15* | <input checked="" type="checkbox"/> | Report numbers of outcome events or summary measures over time                                                                                                                                               | 8-9<br>Supplement             |
| Main results             | 16  | <input checked="" type="checkbox"/> | (a) Give unadjusted estimates and, if applicable, confounder-adjusted estimates and their precision (eg, 95% confidence interval). Make clear which confounders were adjusted for and why they were included | 9-10<br>Table 3<br>Supplement |
|                          |     | <input checked="" type="checkbox"/> | (b) Report category boundaries when continuous variables were categorized                                                                                                                                    | 4                             |
|                          |     |                                     | (c) If relevant, consider translating estimates of relative risk into absolute risk for a meaningful time period                                                                                             |                               |
| Other analyses           | 17  | <input checked="" type="checkbox"/> | Report other analyses done—eg analyses of subgroups and interactions, and sensitivity analyses                                                                                                               | 5-7<br>9-10<br>Supplement     |
| <b>Discussion</b>        |     |                                     |                                                                                                                                                                                                              |                               |
| Key results              | 18  | <input checked="" type="checkbox"/> | Summarise key results with reference to study objectives                                                                                                                                                     | 10-11                         |
| Limitations              | 19  | <input checked="" type="checkbox"/> | Discuss limitations of the study, taking into account sources of potential bias or imprecision. Discuss both direction and magnitude of any potential bias                                                   | 13                            |
| Interpretation           | 20  | <input checked="" type="checkbox"/> | Give a cautious overall interpretation of results considering objectives, limitations, multiplicity of analyses, results from similar studies, and other relevant evidence                                   | 12-14                         |
| Generalisability         | 21  | <input checked="" type="checkbox"/> | Discuss the generalisability (external validity) of the study results                                                                                                                                        | 12-14                         |
| <b>Other information</b> |     |                                     |                                                                                                                                                                                                              |                               |
| Funding                  | 22  | <input checked="" type="checkbox"/> | Give the source of funding and the role of the funders for the present study and, if applicable, for the original study on which the present article is based                                                | 7                             |

\*Give information separately for exposed and unexposed groups.

**Table S6** – Unadjusted primary and secondary outcomes for the full cohort, the early prophylaxis ( $\leq 24$  hours) subgroup, and obese subgroup ( $\text{BMI} \geq 30 \text{ kg/m}^2$ )

| <b>Full cohort</b>              | <b>Weight-based<br/>n = 1065</b> | <b>Standard<br/>n = 3295</b> | <b>p-value</b> |
|---------------------------------|----------------------------------|------------------------------|----------------|
| <b>Primary outcome</b>          |                                  |                              |                |
| VTE                             | 3.1%                             | 3.9%                         | 0.221          |
| <b>Secondary outcomes</b>       |                                  |                              |                |
| DVT                             | 2.5%                             | 2.9%                         | 0.486          |
| PE                              | 1.0%                             | 1.3%                         | 0.531          |
| <b>Complications</b>            |                                  |                              |                |
| Any complication                | 0.9%                             | 1.0%                         | 0.856*         |
| Solid organ bleed               | 0.2%                             | 0.1%                         | 0.252*         |
| GI bleed                        | 0.1%                             | 0.2%                         | 0.688*         |
| Intracranial bleed              | 0.1%                             | 0.2%                         | 1.000*         |
| <b>Early prophylaxis cohort</b> | <b>Weight-based<br/>n = 567</b>  | <b>Standard<br/>n = 1777</b> | <b>p-value</b> |
| <b>Primary outcome</b>          |                                  |                              |                |
| VTE                             | 1.4%                             | 2.1%                         | 0.311          |
| <b>Secondary outcomes</b>       |                                  |                              |                |
| DVT                             | 1.4%                             | 2.0%                         | 0.333          |
| PE                              | 0.9%                             | 1.2%                         | 0.551*         |
| <b>Complications</b>            |                                  |                              |                |
| Any complication                | 0.6%                             | 1.0%                         | 0.306*         |
| Solid organ bleed               | 0.2%                             | 0.1%                         | 0.246*         |
| GI bleed                        | 0.1%                             | 0.3%                         | 0.890*         |
| Intracranial bleed              | 0%                               | 0.1%                         | 1.000*         |
| <b>Obese cohort</b>             | <b>Weight-based</b>              | <b>Standard</b>              | <b>p-value</b> |



|                           | <b>n = 36</b> | <b>n = 1002</b> |        |
|---------------------------|---------------|-----------------|--------|
| <b>Primary outcome</b>    |               |                 |        |
| VTE                       | 11.1%         | 4.2%            | 0.070* |
| <b>Secondary outcomes</b> |               |                 |        |
| DVT                       | 11.1%         | 3.0%            | 0.027* |
| PE                        | 2.8%          | 1.5%            | 0.434* |
| <b>Complications</b>      |               |                 |        |
| Any complication          | 2.8%          | 1.1%            | 0.347* |
| Solid organ bleed         | 0%            | 0%              | n/a    |
| GI bleed                  | 0%            | 0.1%            | 1.000* |
| Intracranial bleed        | 0%            | 0.2%            | 1.000* |

\* Fisher's exact test
